# Supplementary material
Source: PubMed Central journal article supplement (PMC5629913)

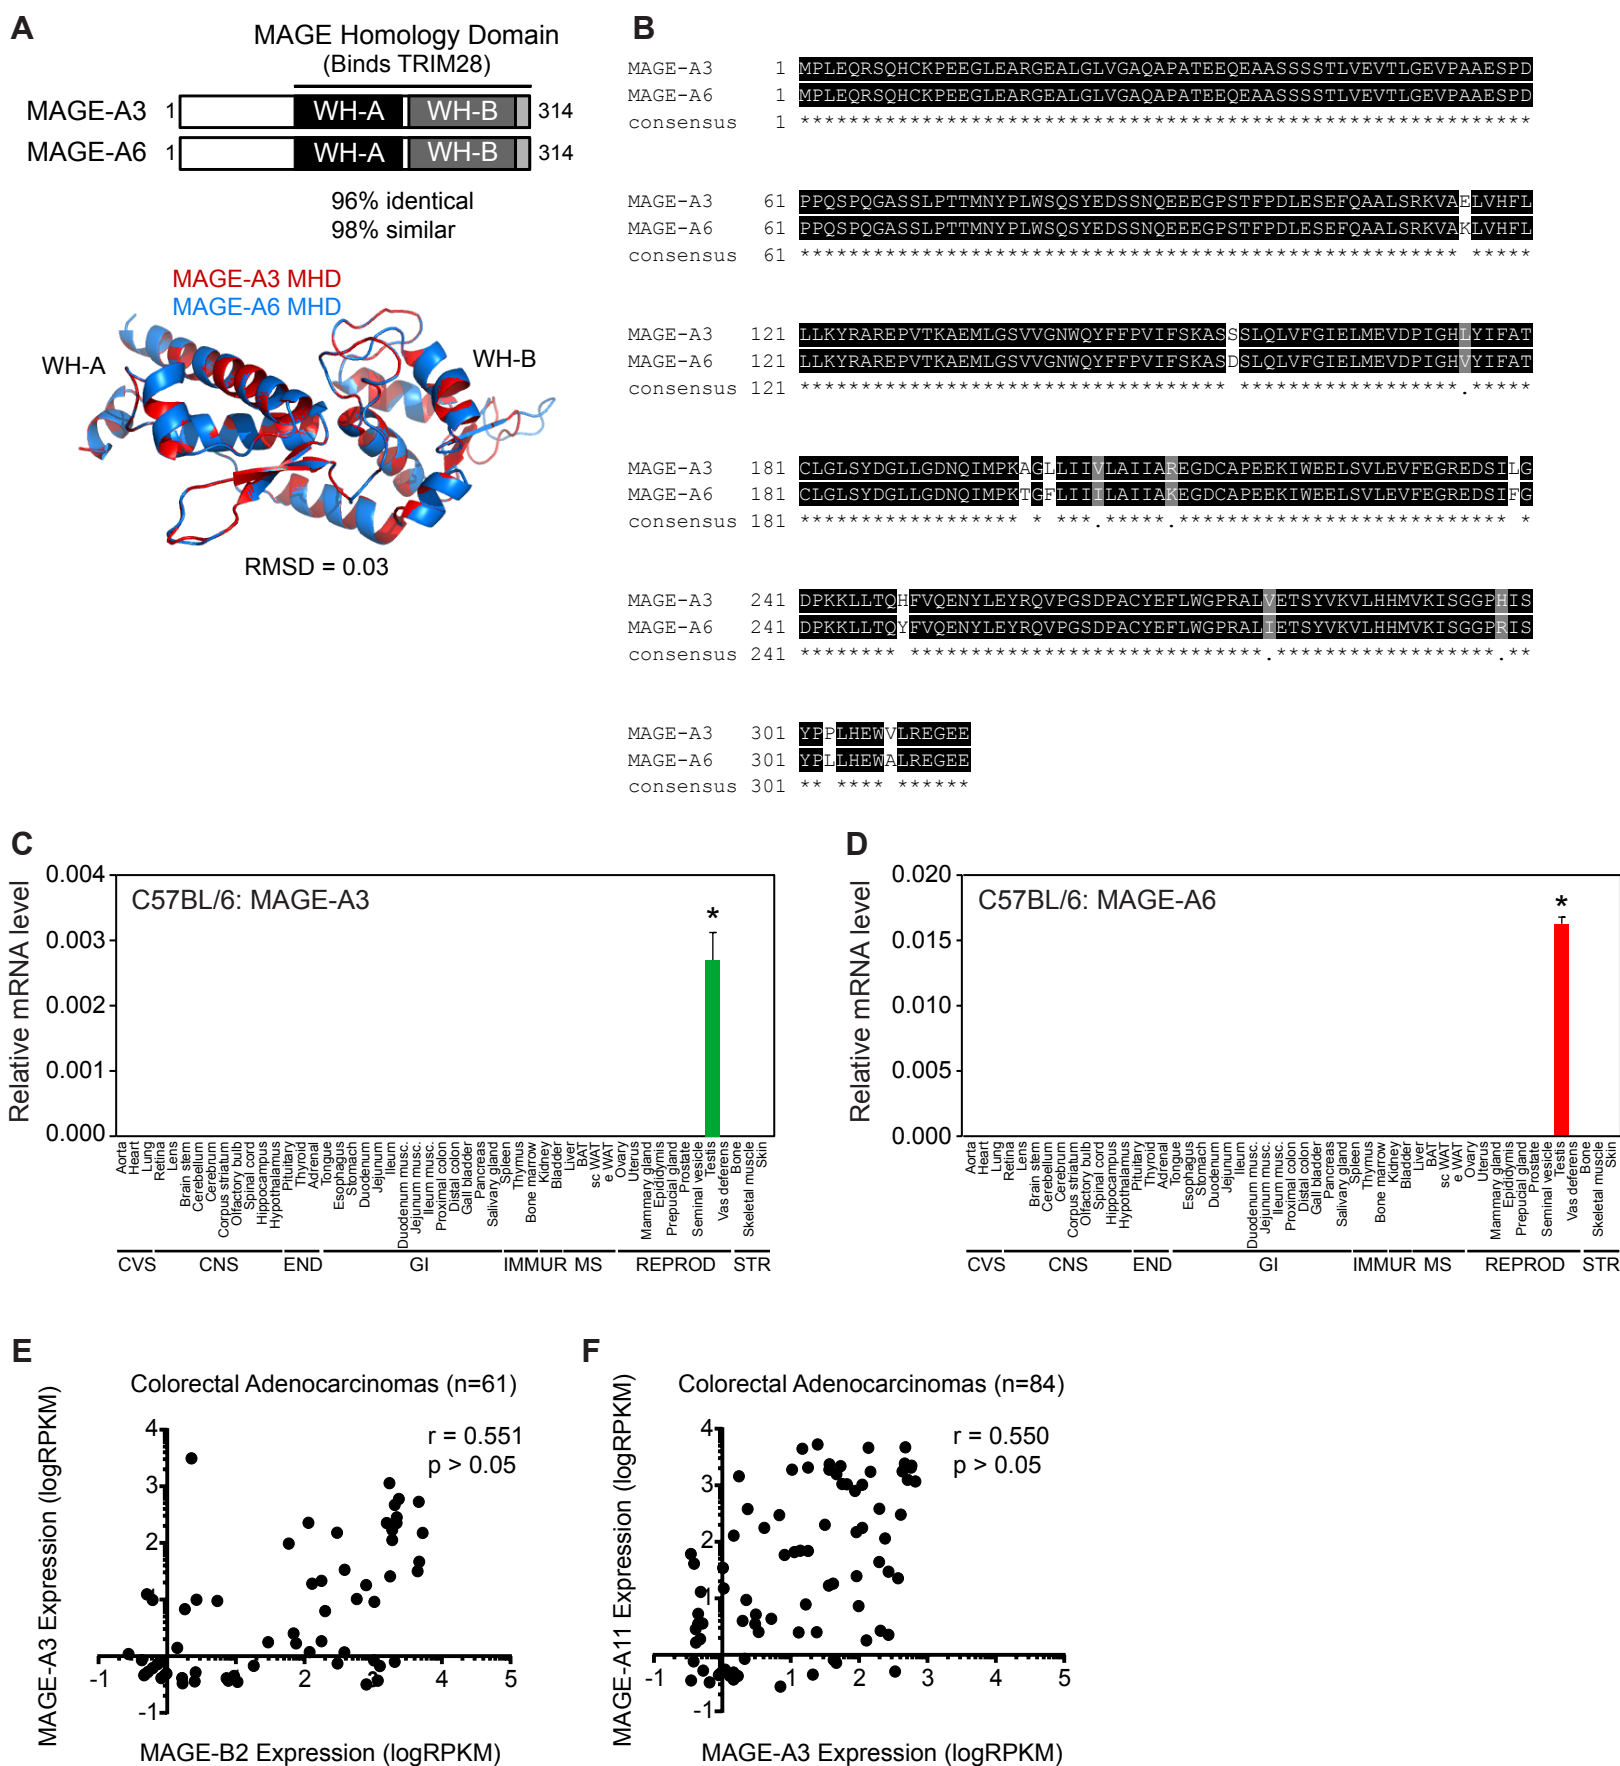

Figure S1

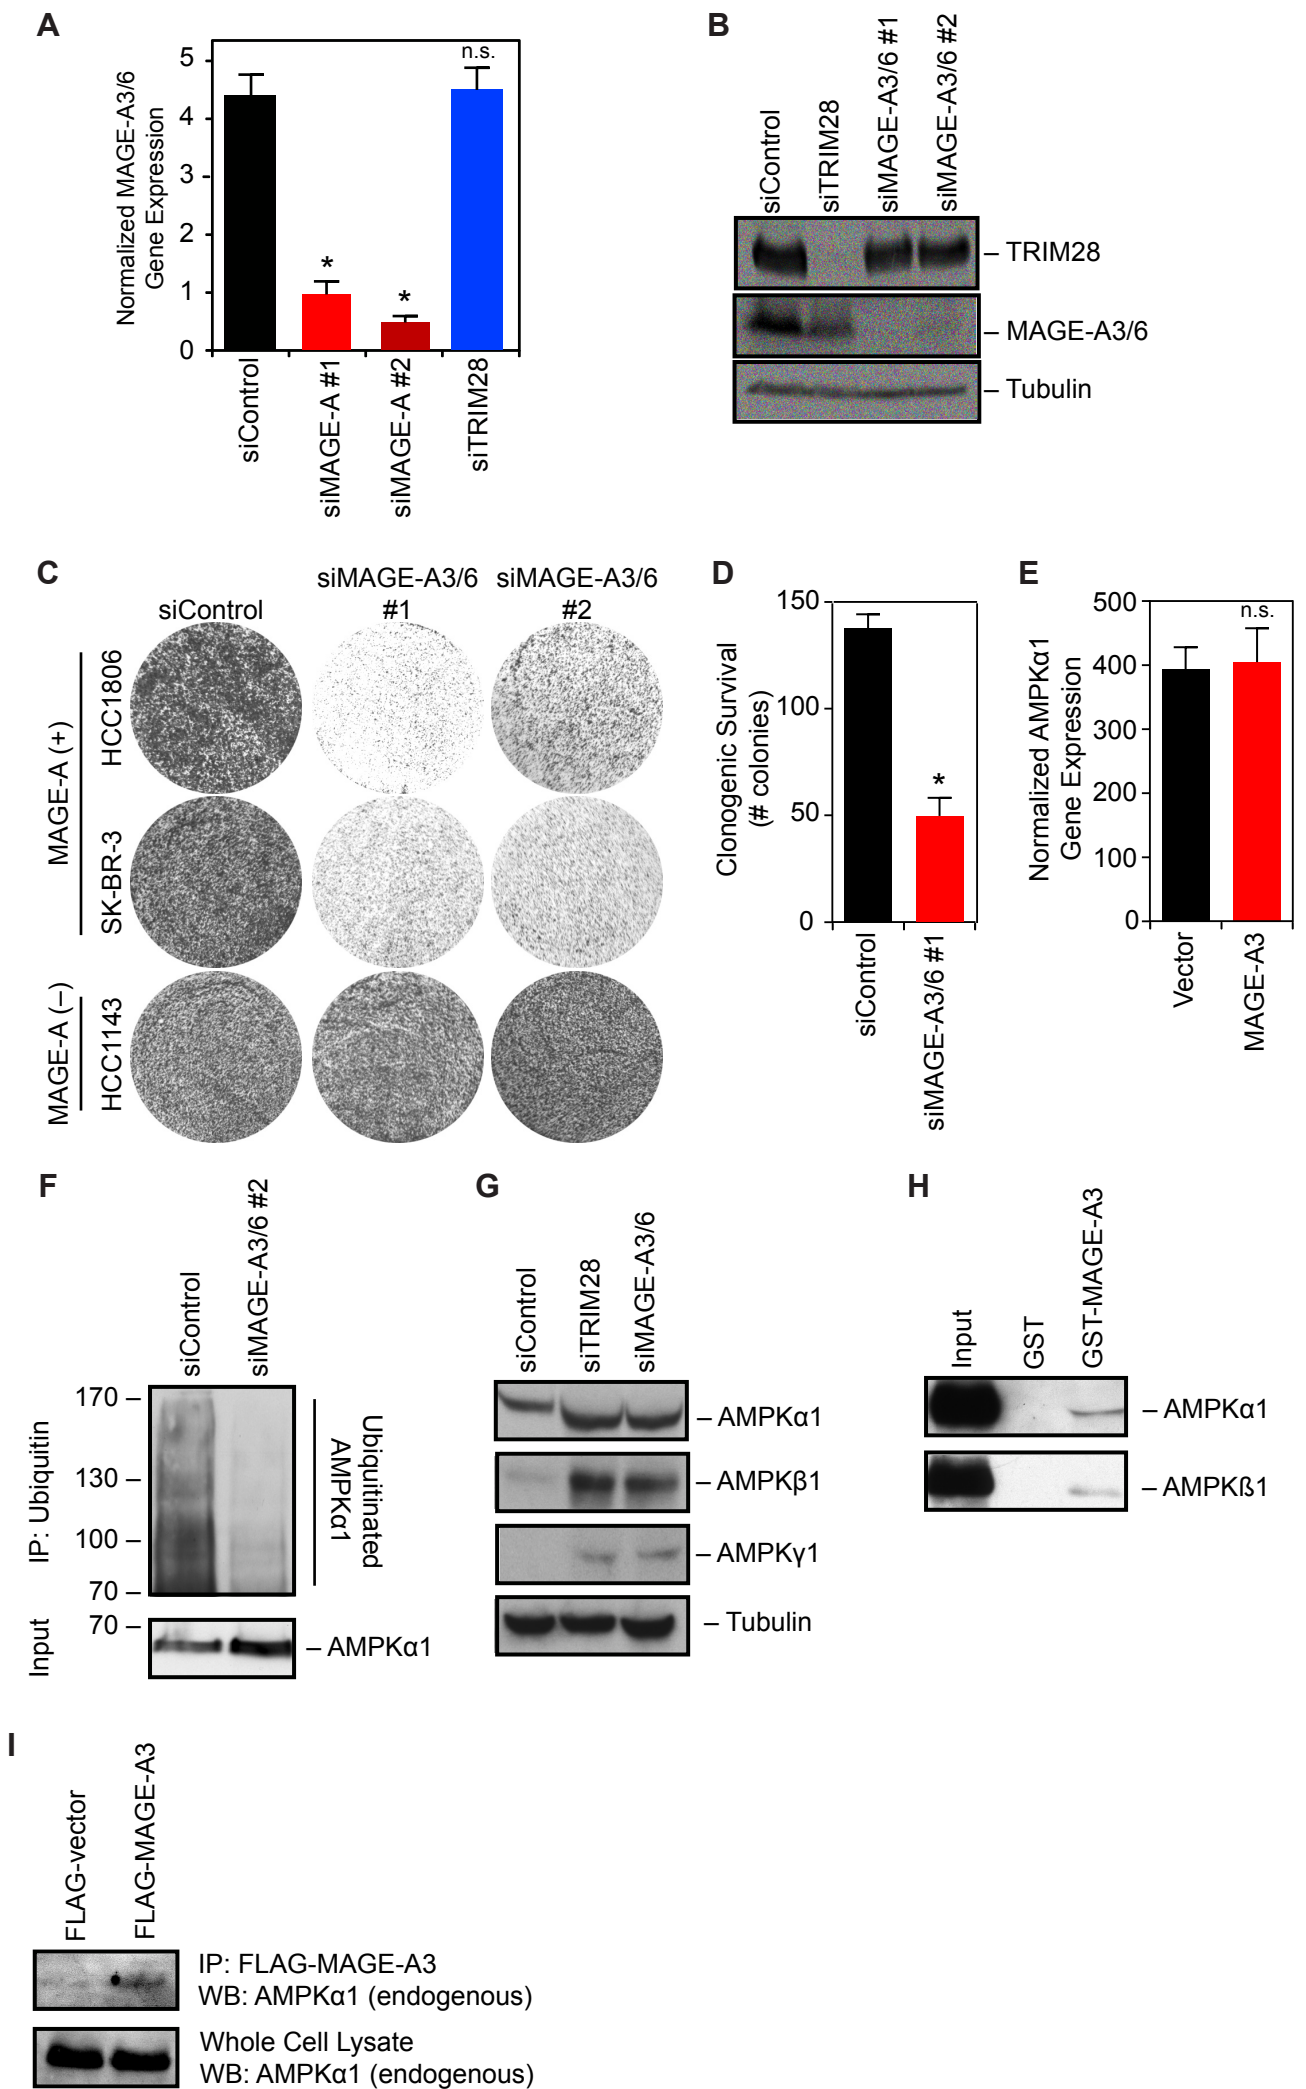

**Figure S2**

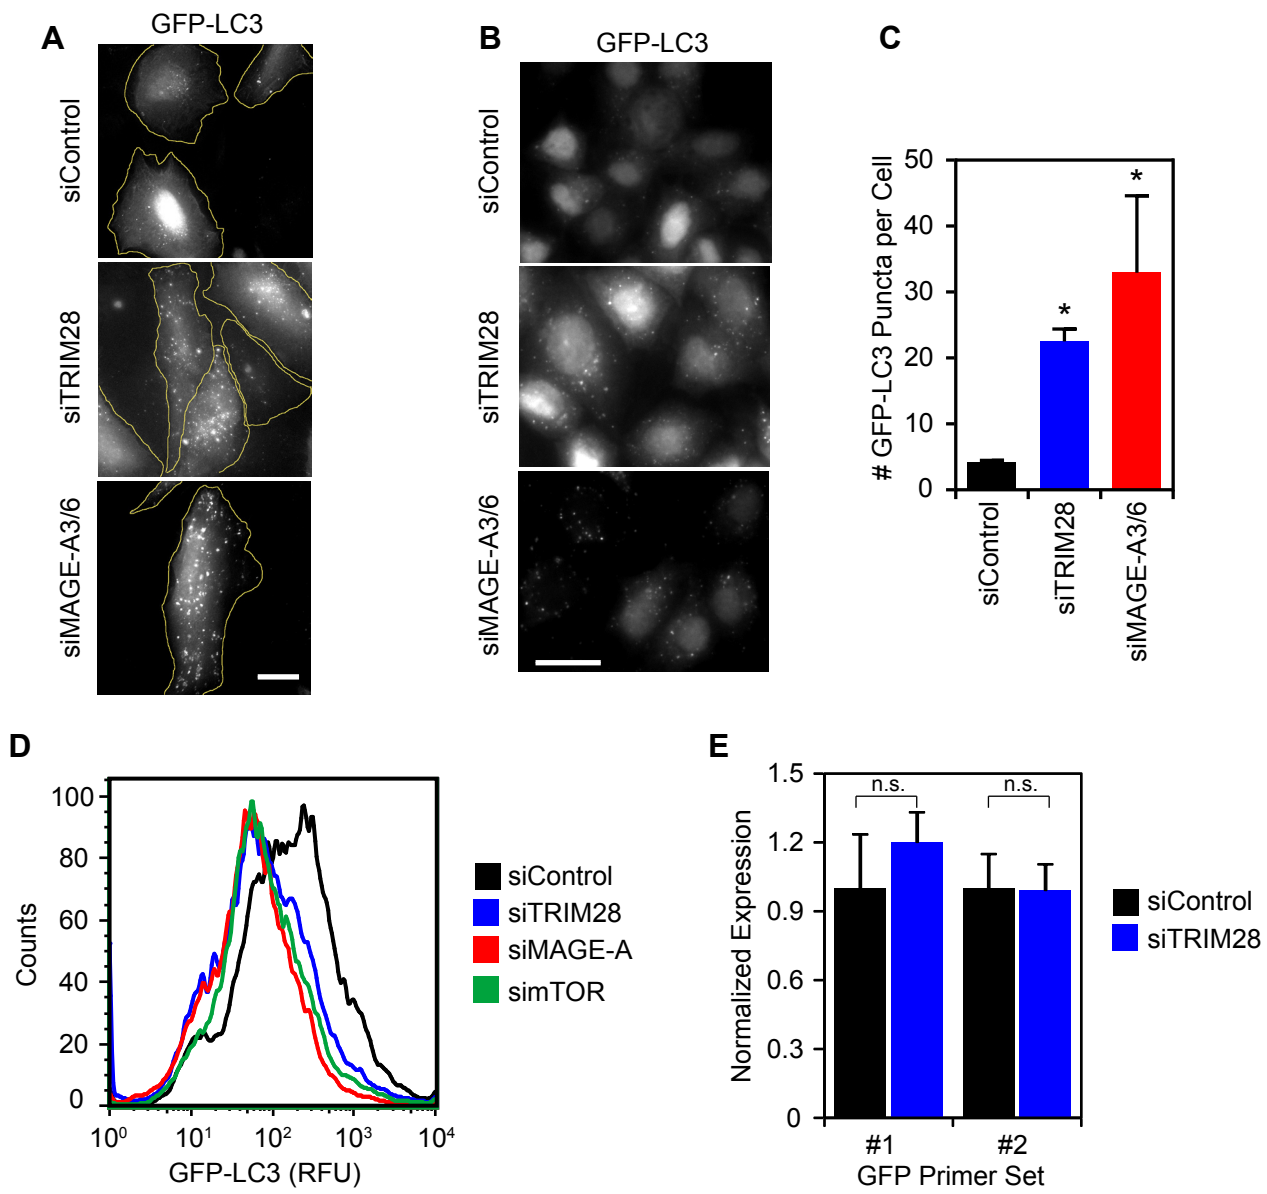

**Figure S3**

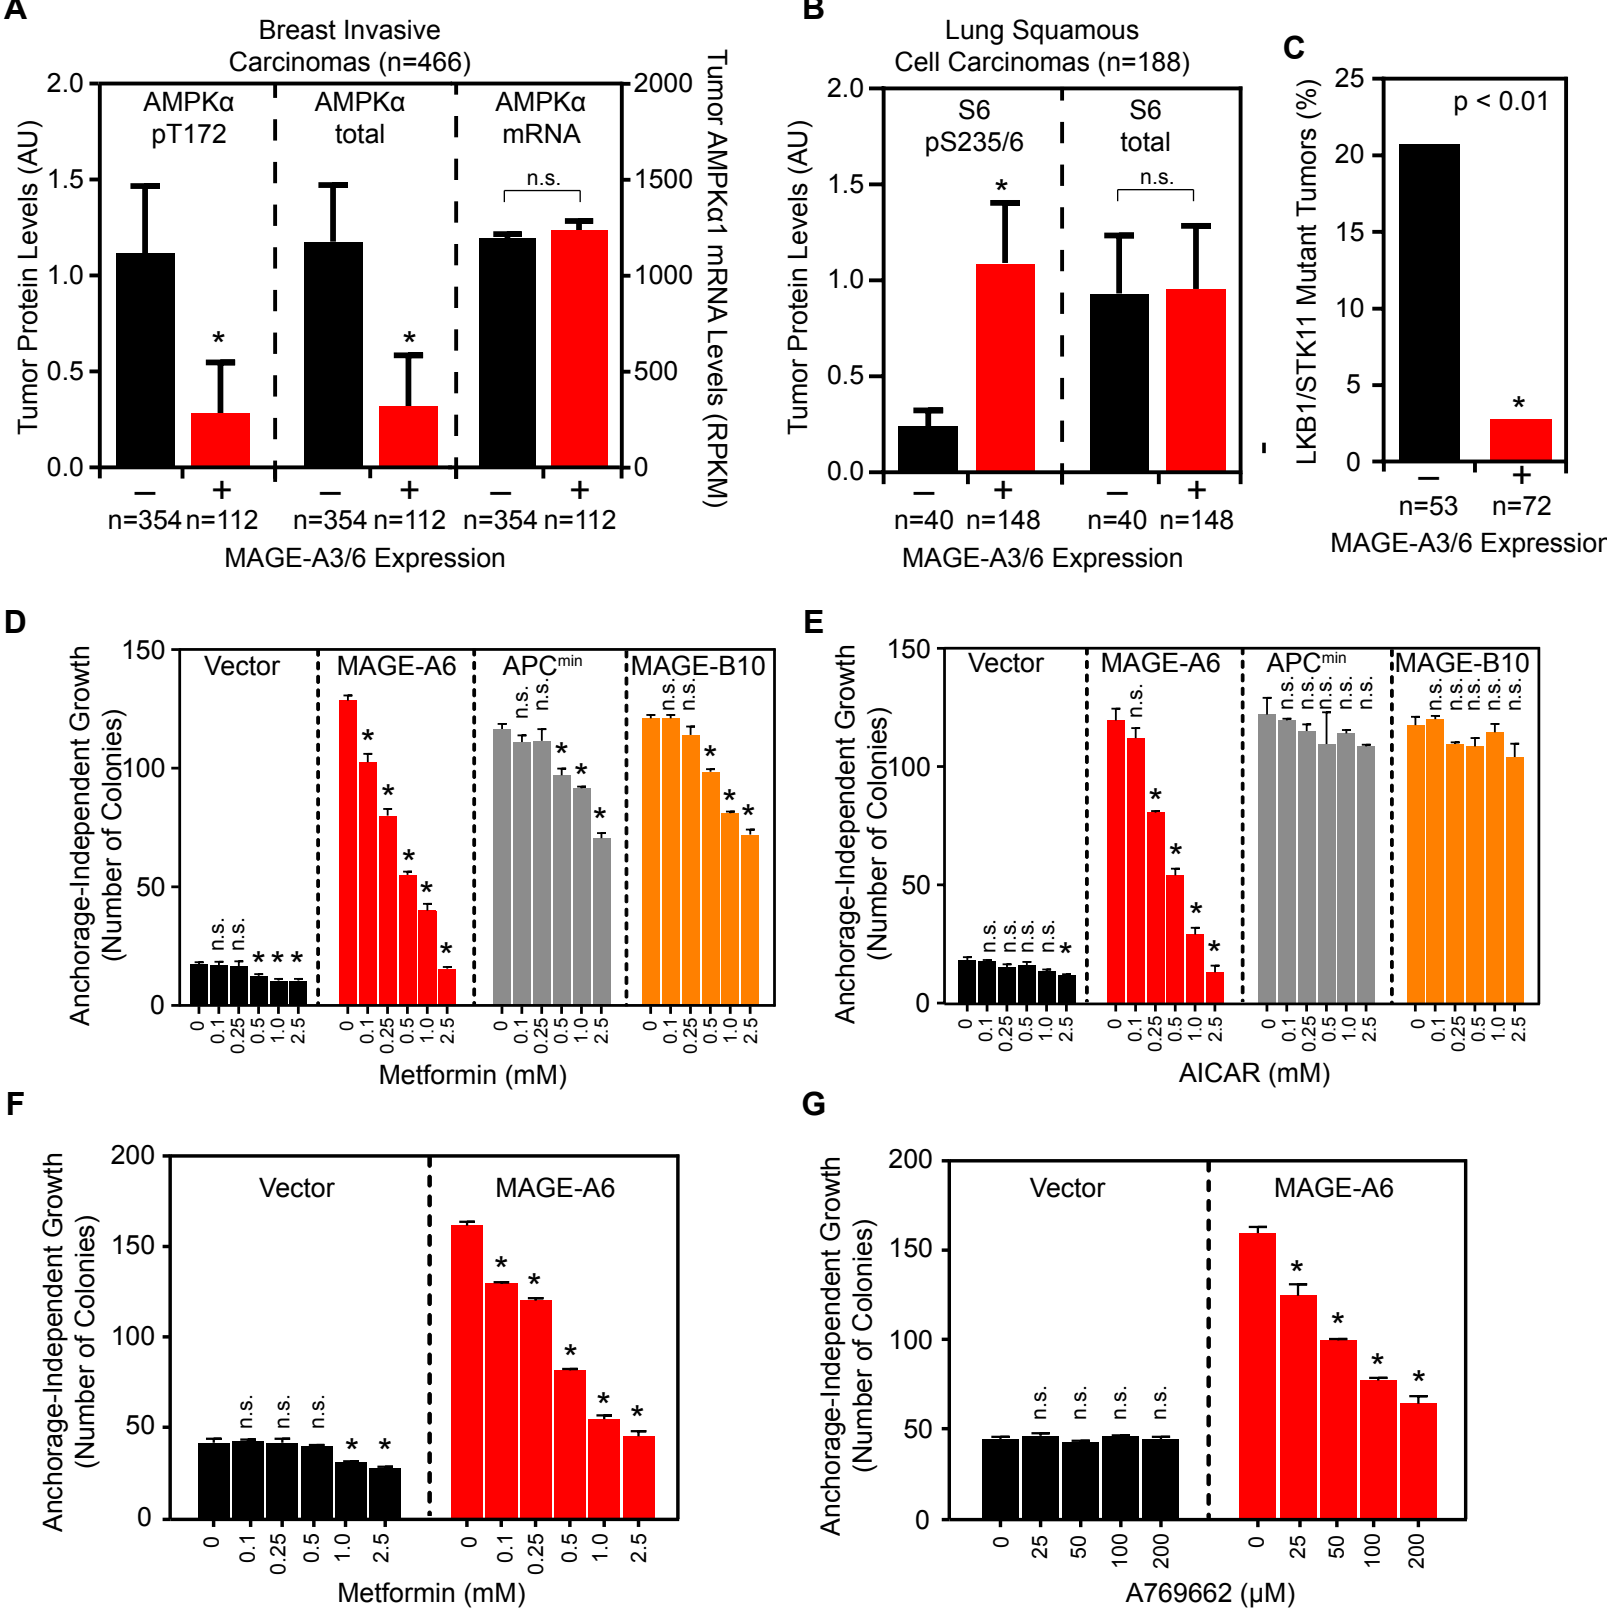

**Figure S4**

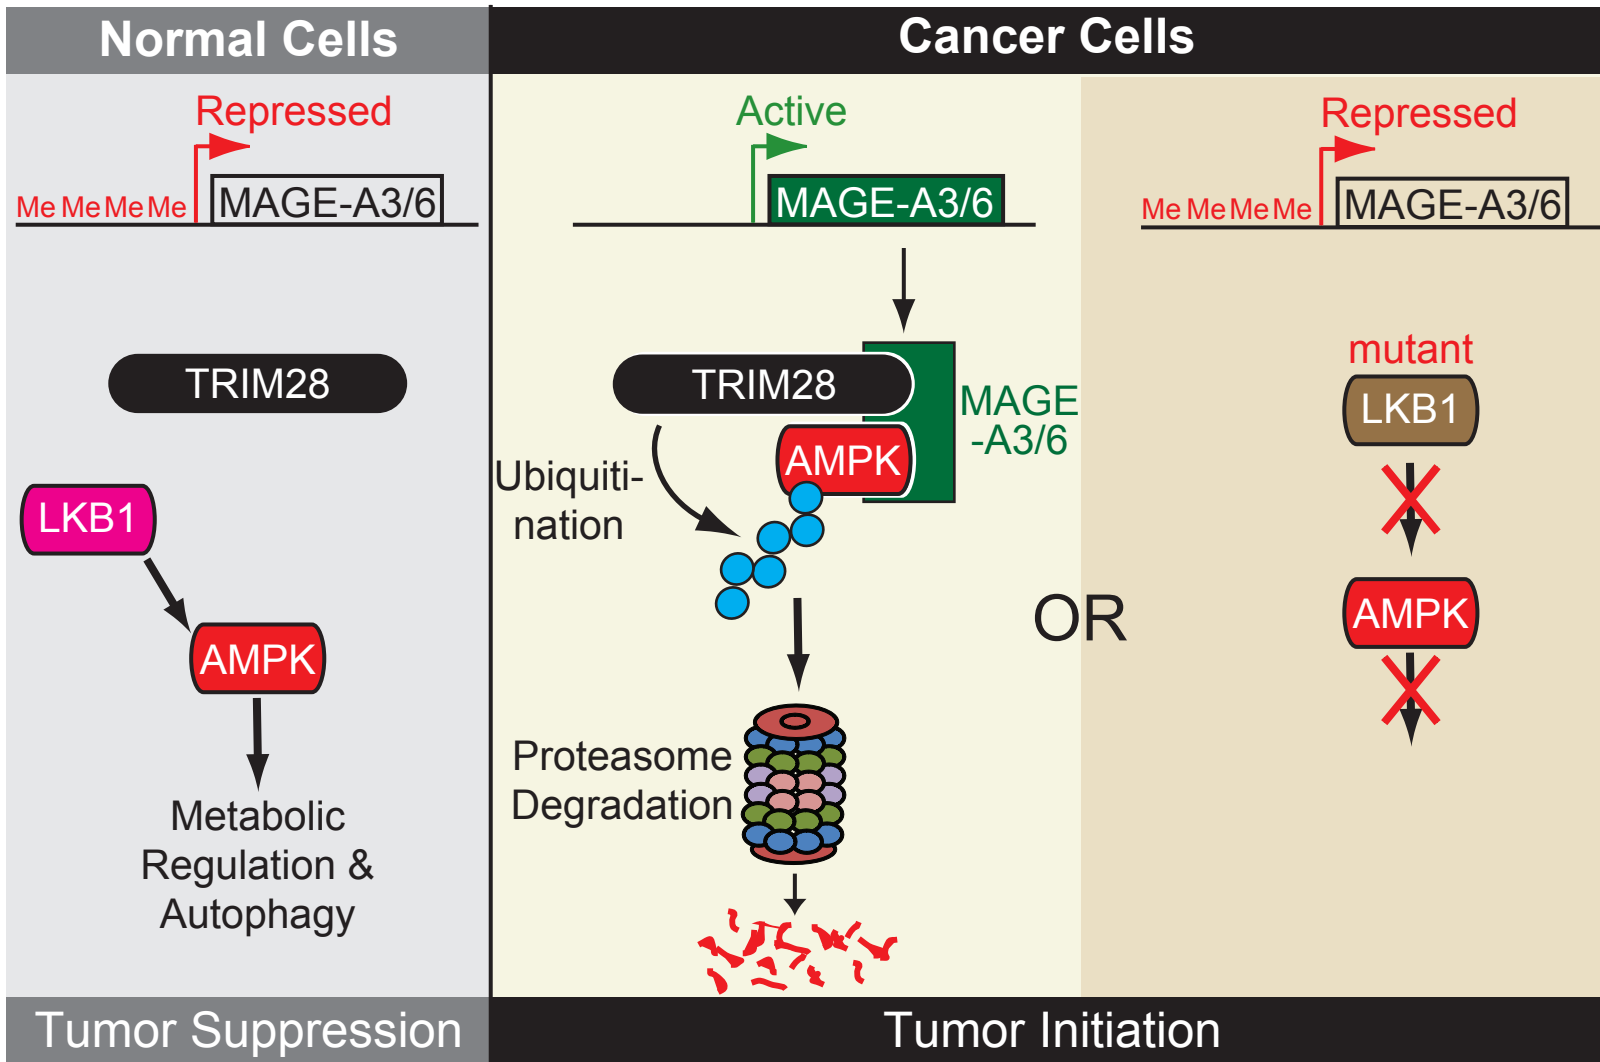

**Figure S5**

Supplement: NIHMS907230-supplement-supplement_1.pdf [file NIHMS907230-supplement-supplement_1.pdf]
